# Supplementary material for: Metabolic syndrome detection with biomarkers in childhood cancer survivors
Source: PubMed Central journal article supplement (PMC7424353; doi:10.1530/ec-20-0144), 2020-06-18

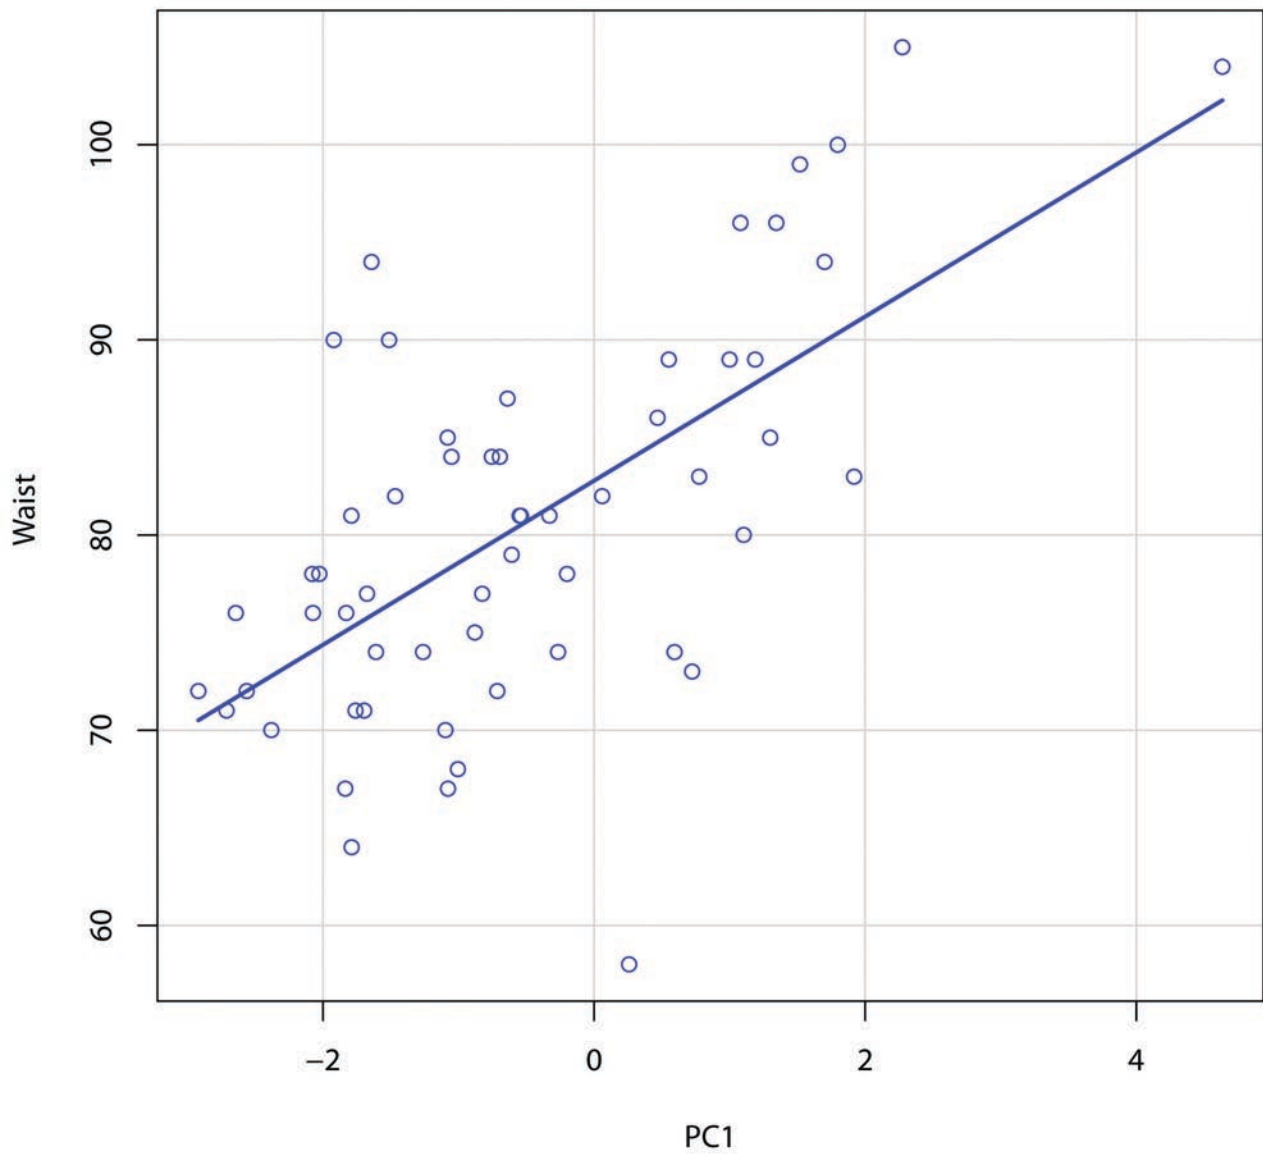

Supplement: supplementary_figure_1.pdf [file supplementary_figure_1.pdf]
