# Supplementary material for: Metabolic syndrome detection with biomarkers in childhood cancer survivors
Source: PubMed Central journal article supplement (PMC7424353; doi:10.1530/ec-20-0144), 2020-06-18
Supplement: supplementary_table_1.pdf [file supplementary_table_1.pdf]

Supplemental Table 1. Baseline characteristics of nephro- and neuroblastoma survivors separated.

|                                        | <b>Nephroblastoma</b> | <b>Neuroblastoma</b> | <b>Bootstrap<br/>95% CI</b> | <b>P-value</b>         |
|----------------------------------------|-----------------------|----------------------|-----------------------------|------------------------|
| Number                                 | 67                    | 36                   |                             |                        |
| Male sex                               | 39 (58.2%)            | 15 (41.7%)           | n.a.                        | 0.16 <sup>1</sup>      |
| Age at follow-up (years) #             | 30.2 [25.2 – 39.4]    | 29.6 [25.1 – 33.4]   | [-4.0;5.9]                  | 0.85 <sup>2</sup>      |
| Age at diagnosis (years) #             | 3.3 [1.8 – 5.2]       | 0.8 [0.3 – 1.9]      | [1.4;3.8]                   | <0.001 <sup>2***</sup> |
| Follow-up time <sup>^</sup> (years) #  | 26.3 [19.3 – 32.7]    | 27.8 [21.7 – 30.9]   | [-6.3;3.1]                  | 0.54 <sup>2</sup>      |
| BMI (kg/m <sup>2</sup> ) #             | 24.6 [21.7 – 27.1]    | 24.1 [ 21.1 – 26.0]  | [-1.7;2.6]                  | 0.72 <sup>2</sup>      |
| Systolic BP (mmHg) #                   | 123 [118 – 133]       | 124 [115 – 129]      | [-6;6]                      | 0.62 <sup>2</sup>      |
| Diastolic BP (mmHg) #                  | 77 [73 – 83]          | 75 [72 – 84]         | [-4;5]                      | 0.20 <sup>2</sup>      |
| Medication use                         |                       |                      |                             |                        |
| Lipid-lowering                         | 3 (4.5%)              | 1 (2.8%)             | n.a.                        | 1 <sup>3</sup>         |
| Diabetes                               | 5 (7.5%)              | 1 (2.8%)             | n.a.                        | 0.66 <sup>3</sup>      |
| Antihypertensive                       | 5 (7.5%)              | 1 (2.8%)             | n.a.                        | 0.66 <sup>3</sup>      |
| Physical activity score #              | 8140 [6634 – 12070]   | 6685 [5805 – 8423]   | [-248;2560]                 | 0.10 <sup>2</sup>      |
| Smoking                                |                       |                      | n.a.                        | 0.29 <sup>1</sup>      |
| Non-smoker                             | 44 (65.7%)            | 18 (50.0%)           |                             |                        |
| Former smoker                          | 8 (11.9%)             | 7 (19.4%)            |                             |                        |
| Smoker                                 | 15 (22.4%)            | 11 (30.6%)           |                             |                        |
| Socio-economic status                  |                       |                      | n.a.                        | 1 <sup>3</sup>         |
| Low                                    | 14 (20.9%)            | 8 (22.2%)            |                             |                        |
| Medium                                 | 24 (35.8%)            | 12 (33.3%)           |                             |                        |
| High                                   | 29 (43.3%)            | 16 (44.4%)           |                             |                        |
| Nephrectomy                            | 67 (100%)             | 7 (19.4%)            | n.a.                        | <0.001 <sup>1***</sup> |
| Adrenalectomy                          | 33 (49.3%)            | 14 (38.9%)           | n.a.                        | 0.42 <sup>1</sup>      |
| Abdominal radiotherapy                 | 35 (52.2%)            | 7 (19.4%)            | n.a.                        | 0.003 <sup>1**</sup>   |
| Pancreas                               | 24 (35.8%)            | 7 (19.4%)            |                             | 0.23 <sup>1</sup>      |
| Flank                                  | 17 (26.6%)            | 0                    |                             | 0.002 <sup>1**</sup>   |
| Cumulative dose<br>radiotherapy (Gy) # | 21 [20 – 30]          | 20 [19.6 – 20.5]     | [-0.7;8.6]                  | 0.064 <sup>2</sup>     |
| Chemotherapy                           | 59 (88.1%)            | 31 (86.1%)           | n.a.                        | 0.76 <sup>3</sup>      |
| Vincristine                            | 50 (74.6%)            | 15 (41.7%)           |                             | 0.002 <sup>1**</sup>   |
| Actinomycine                           | 48 (71.6%)            | 0                    |                             | <0.001 <sup>1***</sup> |
| Anthracyclines                         | 18 (26.9%)            | 12 (33.3%)           |                             | 0.64 <sup>1</sup>      |
| Cyclofosfamide                         | 2 (3.0%)              | 29 (80.6%)           |                             | <0.001 <sup>1***</sup> |
| Cisplatin                              | 0                     | 7 (19.4%)            |                             | <0.001 <sup>3</sup>    |
| Teniposide                             | 0                     | 6 (16.7%)            |                             | 0.001 <sup>3</sup>     |
| Dacarbazine                            | 2 (3.0%)              | 0                    |                             | 0.54 <sup>3</sup>      |
| Ifosfamide                             | 2 (3.0%)              | 0                    |                             | 0.54 <sup>3</sup>      |
| Corticosteroids                        | 0                     | 2 (5.6%)             | n.a.                        | 0.12 <sup>3</sup>      |

BP = blood pressure; n.a. = not applicable.

# Presented as median [IQR]; ^ Time after cessation of treatment.

Significance codes: 0 \*\*\* 0.001 \*\* 0.01 \* 0.05

<sup>1</sup> Chi-squared test, <sup>2</sup> Bootstrapped difference in medians, <sup>3</sup> Fisher's exact test
