# Supplementary material for: Metabolic syndrome detection with biomarkers in childhood cancer survivors
Source: PubMed Central journal article supplement (PMC7424353; doi:10.1530/ec-20-0144), 2020-06-18
Supplement: supplementary_table_2.pdf [file supplementary_table_2.pdf]

Supplemental Table 2a. The effect of abdominal radiotherapy on biomarkers and vascular parameters.

| Variable                                | Abdominal radiotherapy (n=42) # | No abdominal radiotherapy (n=61) # | 95% CI ^     | P-value ^ |
|-----------------------------------------|---------------------------------|------------------------------------|--------------|-----------|
| <b>Biomarkers</b>                       |                                 |                                    |              |           |
| <i>Lipid metabolism</i> <sup>1</sup>    |                                 |                                    |              |           |
| Triglycerides (mmol/L)                  | 1.35 [0.81 – 2.09]              | 0.91 [0.70 – 1.08]                 | [0.06;0.88]  | 0.024*    |
| HDL (mmol/L)                            | 1.32 [1.08 – 1.52]              | 1.35 [1.12 – 1.52]                 | [-0.19;0.13] | 0.74      |
| FFA (mmol/L)                            | 0.57 [0.44 – 0.74]              | 0.50 [0.38 – 0.64]                 | [0.01;0.17]  | 0.026*    |
| ApoA1 (g/L)                             | 1.35 [1.21 – 1.58]              | 1.35 [1.25 – 1.49]                 | [-0.10;0.16] | 0.75      |
| ApoB (g/L)                              | 0.99 [0.81 – 1.18]              | 0.81 [0.65 – 0.97]                 | [0.07;0.30]  | 0.004**   |
| LDL (mmol/L)                            | 3.19 [2.71 – 3.79]              | 2.55 [2.15 – 3.18]                 | [0.15;1.09]  | 0.004**   |
| Leptin (ng/mL)                          | 9.00 [4.98 – 18.38]             | 7.60 [3.67 – 12.90]                | [-2.95;6.81] | 0.51      |
| Adiponectin (µg/mL)                     | 2.30 [0.56 – 4.31]              | 2.83 [1.53 – 4.15]                 | [-2.09;1.22] | 0.64      |
| Lpa (g/L)                               | 0.09 [0.03 – 0.45]              | 0.13 [0.05 – 0.35]                 | [-0.10;0.17] | 0.65      |
| <i>Glucose metabolism</i> <sup>2</sup>  |                                 |                                    |              |           |
| Glucose (mmol/L)                        | 5.0 [4.8 – 5.5]                 | 4.9 [4.6 – 5.3]                    | [-0.2;0.4]   | 0.36      |
| Insulin (pmol/L)                        | 18.0 [13.0 – 44.0]              | 24.0 [13.0 – 58.0]                 | [-22.0;13.0] | 0.48      |
| HOMA                                    | 0.4 [0.4 – 0.8]                 | 0.4 [0.4 – 0.8]                    | [-0.3; 0.3]  | 0.46      |
| <i>Other MetS-associated biomarkers</i> |                                 |                                    |              |           |
| Cystatin C (mg/L)                       | 0.88 [0.83 – 0.97]              | 0.85 [0.77 – 0.90]                 | [0.00;0.09]  | 0.048*    |
| Uric acid (mmol/L)                      | 0.35 [0.29 – 0.44]              | 0.30 [0.24 – 0.38]                 | [-0.01;0.10] | 0.094     |
| Urea (mmol/L)                           | 5.7 [5.1 – 6.8]                 | 5.0 [4.5 – 5.9]                    | [0.1;1.5]    | 0.006**   |
| Creatinine (mg/mmol)                    | 75 [68 – 84]                    | 74 [66 – 85]                       | [-7;9]       | 0.83      |
| hsCRP (mg/L)                            | 1.62 [0.77 – 3.35]              | 1.42 [0.39 – 3.79]                 | [-0.90;1.61] | 0.65      |
| <b>Vascular parameters</b> <sup>3</sup> |                                 |                                    |              |           |
| Central SBP (mmHg)                      | 124 [114 – 132]                 | 109 [101 – 122]                    | [8;20]       | <0.001*** |
| Central DBP (mmHg)                      | 84 [76 – 80]                    | 74 [69 – 77]                       | [4;15]       | <0.001*** |
| Central PP (mmHg)                       | 40 [34 – 47]                    | 37 [30 – 44]                       | [-2;9]       | 0.19      |
| PP (mmHg)                               | 45 [41 – 53]                    | 46 [40 – 49]                       | [-4;6]       | 0.95      |
| PPA                                     | 1.23 [1.06 – 1.40]              | 1.30 [1.03 – 1.48]                 | [-0.21;0.15] | 0.52      |
| Diameter CCA (mm)                       | 6.46 [5.93 – 6.90]              | 6.32 [5.92 – 6.83]                 | [-0.30;0.53] | 0.47      |
| CIMT (µm)                               | 552 [482 – 595]                 | 509 [458 – 569]                    | [-2;71]      | 0.052     |
| DC                                      | 20.6 [15.7 – 26.1]              | 30.3 [21.3 – 39.8]                 | [-13.9;3.1]  | 0.004**   |
| PWV (m/s)                               | 8.0 [6.1 – 8.8]                 | 6.6 [6.0 – 7.3]                    | [0.2;1.9]    | 0.016*    |

S/DBP = systolic/diastolic blood pressure; PP = pulse pressure; PPA = pulse pressure amplification; CCA = common carotid artery; CIMT = carotid intima media thickness; DC = distensibility coefficient; PWV = pulse wave velocity.

# Presented as median [IQR]; ^ Bootstrapped difference in medians

Significance codes: 0 \*\*\* 0.001 \*\* 0.01 \* 0.05

<sup>1</sup> Subjects using lipid-lowering medication excluded (n=3 abdominal radiotherapy, n=1 no abdominal radiotherapy)

<sup>2</sup> Subjects with diabetes excluded (n=5 abdominal radiotherapy, n=1 no abdominal radiotherapy)

<sup>3</sup> Subjects using antihypertensive medication excluded (n=4 abdominal radiotherapy, n=2 no abdominal radiotherapy)
