# Supplementary material for: Metabolic syndrome detection with biomarkers in childhood cancer survivors
Source: PubMed Central journal article supplement (PMC7424353; doi:10.1530/ec-20-0144), 2020-06-18
Supplement: supplementary_table_3.pdf [file supplementary_table_3.pdf]

Supplemental Table 2b. Uni- and multivariable bootstrap linear regression analysis of the influence of abdominal radiotherapy on biomarkers and vascular parameters.

| Variable      | P-value bootstrap difference medians | Univariable analysis |           | Multivariable analysis <sup>1</sup> |         |
|---------------|--------------------------------------|----------------------|-----------|-------------------------------------|---------|
|               |                                      | Beta (s.e.)          | P-value   | Beta (s.e.)                         | P-value |
| Triglycerides | 0.024                                | 0.614 (0.165)        | <0.001*** | 0.572 (0.154)                       | 0.002** |
| FFA           | 0.026                                | 0.123 (0.049)        | 0.008**   | 0.151 (0.059)                       | 0.008** |
| ApoB          | 0.004                                | 0.168 (0.054)        | 0.002**   | 0.083 (0.068)                       | 0.19    |
| LDL           | 0.004                                | 0.469 (0.170)        | 0.008**   | 0.043 (0.235)                       | 0.83    |
| Cystatin C    | 0.048                                | 0.065 (0.032)        | 0.041*    | 0.076 (0.039)                       | 0.039*  |
| Urea          | 0.006                                | 0.895 (0.373)        | 0.011*    | 0.690 (0.465)                       | 0.10    |
| Central SBP   | <0.001                               | 10.226 (3.687)       | 0.008**   | 6.029 (5.033)                       | 0.19    |
| Central DBP   | <0.001                               | 9.122 (2.024)        | <0.001*** | 5.385 (2.929)                       | 0.023*  |
| DC            | 0.004                                | -8.578 (2.810)       | 0.004**   | -2.672 (3.279)                      | 0.44    |
| PWV           | 0.016                                | 0.935 (0.451)        | 0.025*    | 0.294 (0.456)                       | 0.53    |

Significance codes: 0 \*\*\* 0.001 \*\* 0.01 \* 0.05

<sup>1</sup> Corrected for age, sex, smoking and socio-economic status.
