# Supplementary material for: Metabolic syndrome detection with biomarkers in childhood cancer survivors
Source: PubMed Central journal article supplement (PMC7424353; doi:10.1530/ec-20-0144), 2020-06-18
Supplement: supplementary_table_4.pdf [file supplementary_table_4.pdf]

Supplemental Table 2c. The effect of nephrectomy on biomarkers and vascular parameters.

| Variable                                | Nephrectomy<br>(n=74) # | No nephrectomy<br>(n=29) # | 95% CI ^     | P-value ^ |
|-----------------------------------------|-------------------------|----------------------------|--------------|-----------|
| <b>Biomarkers</b>                       |                         |                            |              |           |
| <i>Lipid metabolism</i> <sup>1</sup>    |                         |                            |              |           |
| Triglycerides (mmol/L)                  | 0.98 [0.77 – 1.58]      | 0.90 [0.70 – 1.19]         | [-0.16;0.37] | 0.43      |
| HDL (mmol/L)                            | 1.35 [1.09 – 1.55]      | 1.32 [1.16 – 1.48]         | [-0.13;0.16] | 0.72      |
| FFA (mmol/L)                            | 0.50 [0.40 – 0.61]      | 0.65 [0.49 – 0.77]         | [-0.26;0.01] | 0.054     |
| ApoA1 (g/L)                             | 1.38 [1.24 – 1.54]      | 1.31 [1.20 – 1.51]         | [-0.04;0.16] | 0.18      |
| ApoB (g/L)                              | 0.85 [0.70 – 1.05]      | 0.86 [0.74 – 1.08]         | [-0.17;0.13] | 0.79      |
| LDL (mmol/L)                            | 2.83 [2.20 – 3.54]      | 2.92 [2.45 – 3.63]         | [-0.69;0.28] | 0.43      |
| Leptin (ng/mL)                          | 8.37 [3.64 – 18.38]     | 8.10 [5.44 – 12.90]        | [-5.47;3.66] | 0.86      |
| Adiponectin (µg/mL)                     | 2.47 [0.98 – 4.31]      | 3.02 [1.81 – 4.13]         | [-1.58;0.55] | 0.26      |
| Lpa (g/L)                               | 0.13 [0.05 – 0.35]      | 0.11 [0.05 – 0.39]         | [-0.11;0.08] | 0.80      |
| <i>Glucose metabolism</i> <sup>2</sup>  |                         |                            |              |           |
| Glucose (mmol/L)                        | 5.0 [4.7 – 5.3]         | 4.8 [4.5 – 5.4]            | [-0.1;0.5]   | 0.086     |
| Insulin (pmol/L)                        | 29.0 [13.0 – 55.0]      | 13.0 [13.0 – 49.0]         | [-6.0;23.0]  | 0.088     |
| HOMA                                    | 0.6 [0.4 – 0.9]         | 0.4 [0.4 – 0.8]            | [-0.1; 0.3]  | 0.060     |
| <i>Other MetS-associated biomarkers</i> |                         |                            |              |           |
| Cystatin C (mg/L)                       | 0.88 [0.84 – 0.99]      | 0.81 [0.72 – 0.86]         | [0.03;0.16]  | 0.002**   |
| Uric acid (mmol/L)                      | 0.35 [0.27 – 0.43]      | 0.26 [0.21 – 0.31]         | [0.02;0.13]  | 0.002**   |
| Urea (mmol/L)                           | 5.4 [4.8 – 6.6]         | 5.0 [4.2 – 5.7]            | [-0.2;1.0]   | 0.084     |
| Creatinine (mg/mmol)                    | 79 [69 – 89]            | 69 [63 – 75]               | [2;16]       | 0.004**   |
| hsCRP (mg/L)                            | 1.62 [0.72 – 3.48]      | 1.42 [0.39 – 3.09]         | [-0.93;1.45] | 0.46      |
| <b>Vascular parameters</b> <sup>3</sup> |                         |                            |              |           |
| Central SBP (mmHg)                      | 118 [108 – 127]         | 108 [100 – 123]            | [0;19]       | 0.050*    |
| Central DBP (mmHg)                      | 77 [72 – 85]            | 75 [71 – 79]               | [-2;7]       | 0.17      |
| Central PP (mmHg)                       | 39 [34 – 47]            | 34 [30 – 43]               | [-3;10]      | 0.14      |
| PP (mmHg)                               | 46 [40 – 53]            | 45 [41 – 48]               | [-3;5]       | 0.62      |
| PPA                                     | 1.23 [0.99 – 1.41]      | 1.31 [1.13 – 1.54]         | [-0.30;0.09] | 0.43      |
| Diameter CCA (mm)                       | 6.30 [5.87 – 6.82]      | 6.57 [6.13 – 6.93]         | [-0.72;0.21] | 0.32      |
| CIMT (µm)                               | 521 [479 – 582]         | 523 [461 – 570]            | [-43;53]     | 0.81      |
| DC                                      | 24.0 [15.8 – 39.8]      | 29.9 [24.0 – 31.9]         | [-10.7;1.5]  | 0.13      |
| PWV (m/s)                               | 6.8 [6.0 – 8.0]         | 6.9 [6.1 – 7.5]            | [-0.7;0.7]   | 0.79      |

S/DBP = systolic/diastolic blood pressure; PP = pulse pressure; PPA = pulse pressure amplification; CCA = common carotid artery; CIMT = carotid intima media thickness; DC = distensibility coefficient; PWV = pulse wave velocity.

# Presented as median [IQR]; ^ Bootstrapped difference in medians

Significance codes: 0 \*\*\* 0.001 \*\* 0.01 \* 0.05

<sup>1</sup> Subjects using lipid-lowering medication excluded (n=3 nephrectomy, n=1 no nephrectomy)

<sup>2</sup> Subjects with diabetes excluded (n=5 nephrectomy, n=1 no nephrectomy)

<sup>3</sup> Subjects using antihypertensive medication excluded (n=6 nephrectomy)
