# Supplementary material for: Metabolic syndrome detection with biomarkers in childhood cancer survivors
Source: PubMed Central journal article supplement (PMC7424353; doi:10.1530/ec-20-0144), 2020-06-18
Supplement: supplementary_table_5.pdf [file supplementary_table_5.pdf]

Supplemental Table 2d. Uni- and multivariable bootstrap linear regression analysis of the influence of nephrectomy on biomarkers and vascular parameters.

| Variable    | P-value bootstrap difference medians | Univariable analysis |           | Multivariable analysis <sup>1</sup> |           |
|-------------|--------------------------------------|----------------------|-----------|-------------------------------------|-----------|
|             |                                      | Beta (s.e.)          | P-value   | Beta (s.e.)                         | P-value   |
| Cystatin C  | 0.002                                | 0.128 (0.027)        | <0.001*** | 0.115 (0.027)                       | <0.001*** |
| Uric acid   | 0.002                                | 0.075 (0.017)        | <0.001*** | 0.045 (0.013)                       | 0.006**   |
| Creatinine  | 0.004                                | 12.062 (2.899)       | 0.002**   | 6.954 (2.640)                       | 0.042*    |
| Central SBP | 0.050                                | 8.233 (4.089)        | 0.054     | -                                   | -         |

Significance codes: 0 \*\*\* 0.001 \*\* 0.01 \* 0.05

<sup>1</sup> Corrected for age, sex, smoking and socio-economic status
